# Supplementary material for: A critical role for MSR1 in vesicular stomatitis virus infection of the central nervous system
Source: PubMed Central journal article supplement — iScience. 2021 Jun 1;24(6):102678. doi: 10.1016/j.isci.2021.102678 (PMC8208900; doi:10.1016/j.isci.2021.102678), 2021-06-01
Supplement: mmc1.pdf [file mmc1.pdf]

**iScience, Volume 24**

**Supplemental information**

**A critical role for MSR1 in vesicular stomatitis  
virus infection of the central nervous system**

**Duomeng Yang, Tao Lin, Cen Li, Andrew G. Harrison, Tingting Geng, and Penghua Wang**

1 Supplemental Figures

2

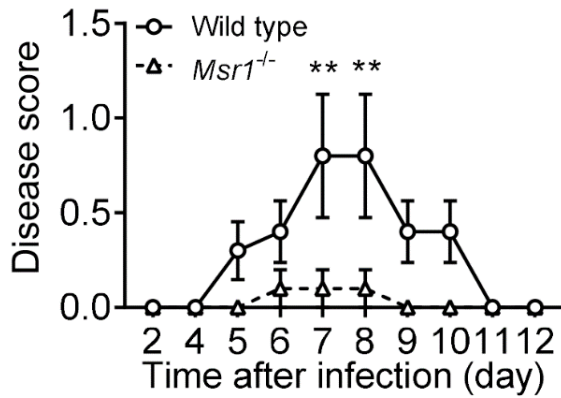

3

4 **Figure S1 *Msr1*-deficiency renders mice resistant to VSV intranasal infection,**

5 **Related to Figure 1.** The disease scores of WT and *Msr1*<sup>-/-</sup> mice inoculated with VSV

6 intranasally. The mice were inoculated intranasally with  $1 \times 10^7$  PFU of VSV per mouse

7 in a 25- $\mu$ l volume. The disease scores from WT and *Msr1*<sup>-/-</sup> were then recorded on a

8 scale of 0-5, as previously described in the detailed methods (N=10 mice/group). The

9 data are presented as mean  $n \pm$  SD and statistical significances are analyzed by non-

10 parametric Mann-Whitney U test, \*\*  $P < 0.01$ .

11

12

13

14

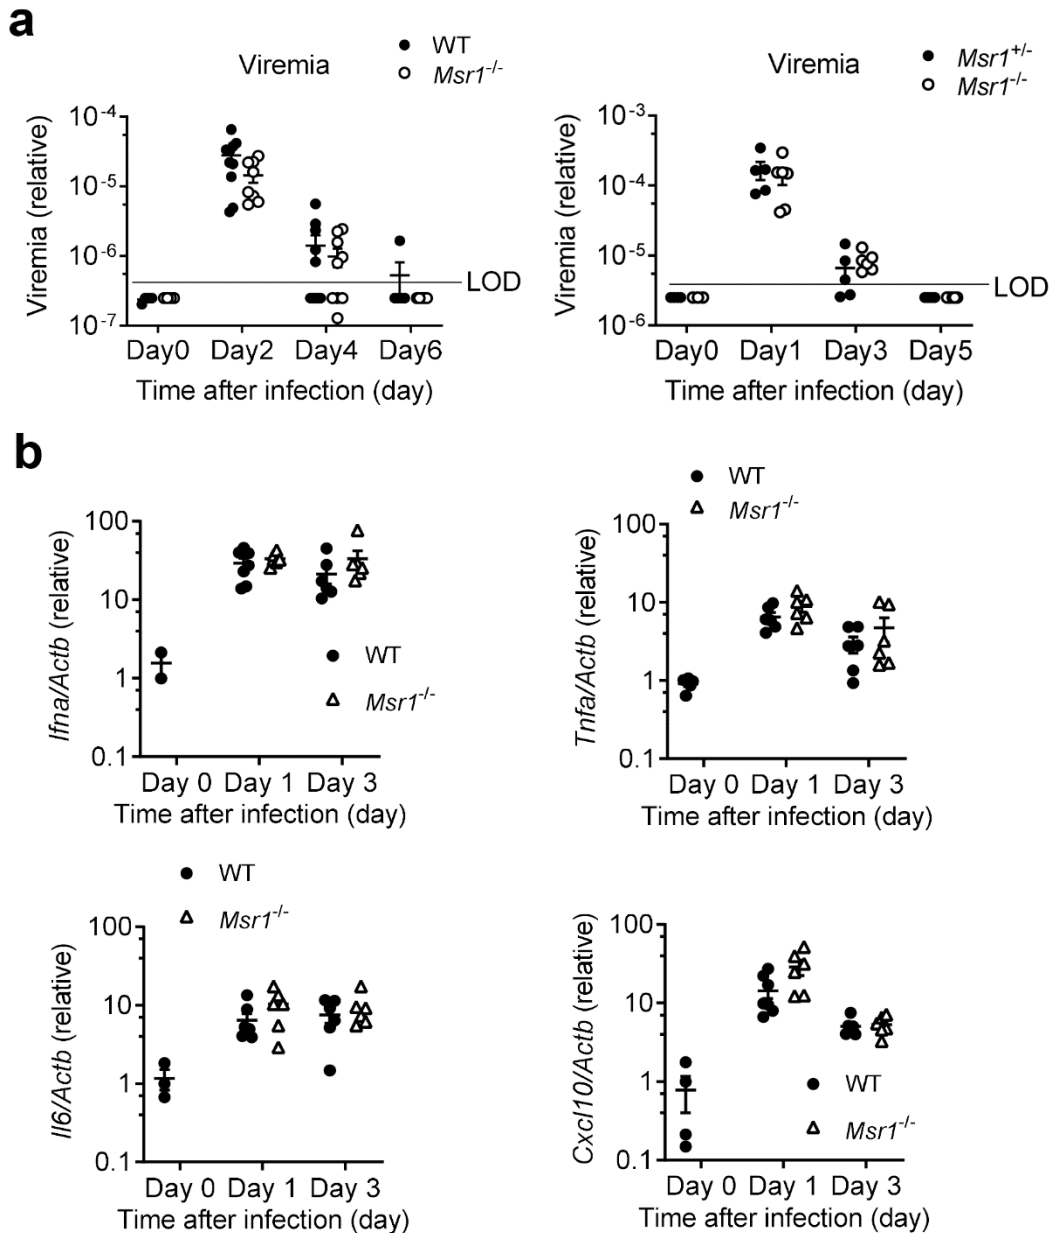

15

16 **Figure S2 *Msr1* is dispensable for systemic VSV dissemination and innate immune**  
 17 **responses, Related to Figure 2. a)** The viremia of WT mice, *Msr1*<sup>+/-</sup> and *Msr1*<sup>-/-</sup>  
 18 littermates infected with 1×10<sup>6</sup> PFU/mouse of VSV by retro-orbital injection, assessed  
 19 by quantitative RT-PCR, N=8-9 mice/group for WT and *Msr1*<sup>-/-</sup>, N=5 mice/genotype  
 20 for *Msr1*<sup>+/-</sup> and *Msr1*<sup>-/-</sup> littermates. **b)** The mRNA levels of *Ifna*, *Tnfa*, *Il6* and *Cxcl10*  
 21 in leukocytes of WT and *Msr1*<sup>-/-</sup> mice after VSV infection, assessed by quantitative RT-  
 22 PCR, N=6 mice/group. All the data are presented as mean ± S.E.M. and statistical  
 23 significance are analyzed by non-parametric Mann-Whitney U test.

24

25

26

27

28

**a** Design of MSR1 fragments

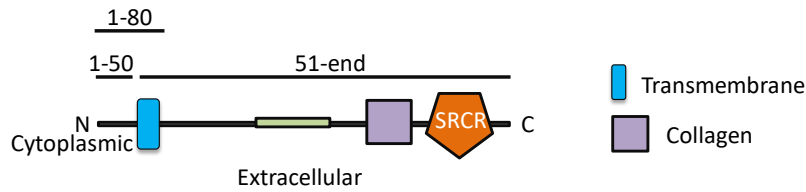

**b** MSR1 pulldown with live VSV-GFP particles

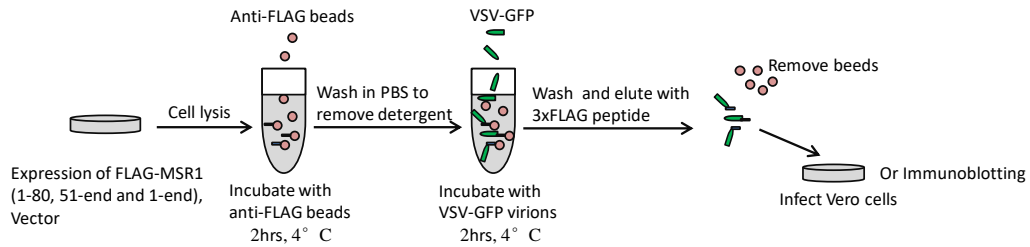

29

30

31 **Figure S3 The domain structure of MSR1 protein and workflow of MSR1**  
32 **pulldown with live VSV-GFP virions, Related to Figure 5 and Figure 6. a)** Amino  
33 residues 1-50: cytoplasmic N-tail, 1-80: cytoplasmic N-tail plus transmembrane, and  
34 51-end: extracellular domains including the collagen, scavenger receptor cysteine-rich  
35 (SRCR) and the transmembrane domains. **b)** The procedure of MSR1 pulldown with  
36 live VSV-GFP particles.

37

38

39

40

41

42

43

44

45

46

47

48

49

50

51

52

53

54

55

56

57

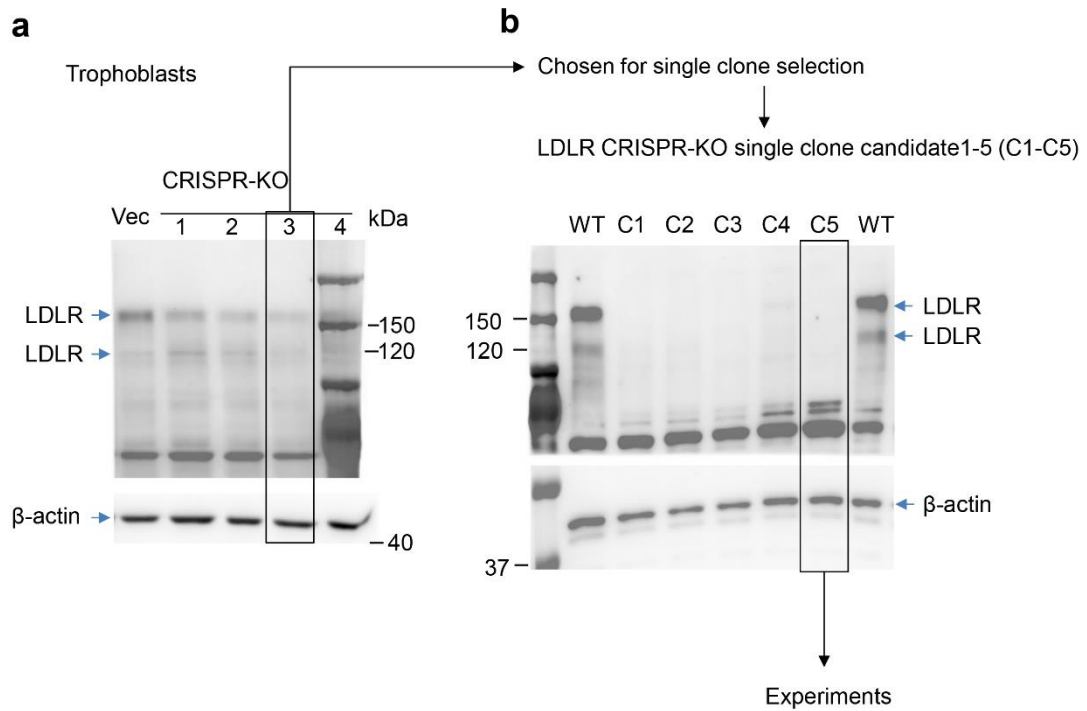

58

59 **Figure S4 Generating *LDLR*<sup>-/-</sup> single clonal trophoblast by CRISPR-Cas9 system,**  
 60 **Related to Figure 4. a) Generating knockout of LDLR in trophoblasts using CRISPR-**  
 61 **Cas9 method. LDLR band size: 120 kDa, 150 kDa. b) Single clone selection of**  
 62 **CRISPR-knockout *LDLR*<sup>-/-</sup> trophoblast, C1-C5: Candidate 1-5. The C5 was chosen to**  
 63 **further experiment due to its complete knockout of LDLR. β-actin is a housekeeping**  
 64 **control.**

65

66

67

68

69

70

71

72

73

74

75

76

77

78

79

80

81

82

83

84

85

86 **Supplemental Tables**

87

## 88 Supplemental Table S1

89 **Primers for gene subcloning and expression with restriction enzyme sites, Related to STAR**

90

**Methods and Figure 5**

| Gene                                     | Species | Forward primer (5'-3')               | Reverse primer (5'-3')               | Enzyme sites      |
|------------------------------------------|---------|--------------------------------------|--------------------------------------|-------------------|
| <i>MSRI</i>                              | Hs      | CTTGCGGCCGCGGAGC<br>AGTGGGATCACTTTCA | TTGGATCCCTATAAAGTGC<br>AAGTGACTCCAGC | NotI and<br>BamHI |
| <i>MSRI</i><br>fragment<br><i>1-50</i>   | Hs      | CTTGCGGCCGCGGAGC<br>AGTGGGATCACTTTCA | TTGGATCCCTAAGCTTTG<br>AAGGACTTCAGTT  | NotI and<br>BamHI |
| <i>MSRI</i><br>fragment<br><i>1-80</i>   | Hs      | CTTGCGGCCGCGGAGC<br>AGTGGGATCACTTTCA | TTGGATCCCTACGTTTCCC<br>ACTTCAGGAG    | NotI and<br>BamHI |
| <i>MSRI</i><br>fragment<br><i>51-end</i> | Hs      | CTTGCGCCCGCGGCAC<br>TGATTGCCCTTTAC   | TTGGATCCCTATAAAGTGC<br>AAGTGACTCCAGC | NotI and<br>BamHI |

91

92

93

94

95

96

97

98

99

## Primers for qPCR, Related to Figure 3

| Gene             | Species        | Forward primer (5'-3')   | Reverse primer (5'-3')   |
|------------------|----------------|--------------------------|--------------------------|
| VSV              | Indiana strain | TGATACAGTACAATTATTTGGGAC | GAGACTTTCTGTTACGGGATCTGG |
| Ldlr             | Mm             | GAATCTACTGGTCCGACCTGTC   | CTGTCCAGTAGATGTTGCGGTG   |
| Msr1<br>(Scara1) | Mm             | AGTGCTGTCTTCTTTACCAGC    | GTGAGGAAGGGATGCTGTA      |
| Scara2           | Mm             | ATGGCACCAAGGGAGACAAAGG   | GCCTGGTTTTCCAGCATCACCT   |
| Scara3           | Mm             | CCACGGAGAAATCCTTCGCAATG  | TAGGTCCTCTGCTACCAACAGG   |
| Scara4           | Mm             | ACTCCAAGCACGGTCAGCTCAT   | CTTGTTGCCAGTTGGACCAGGT   |
| Scara5           | Mm             | TTTGATGGCAGGAGCCTGTCCA   | CCCACAAGAATCAGGAAGACCAG  |
| Scarb1           | Mm             | ACACCCGAATCCTCGCTGGAAT   | CCGTTGGCAAACAGAGTATCGG   |
| Scarb2           | Mm             | TAGCCAACACCTCCGAAAACGC   | CGAACTTCTCGTCGGCTTGTA    |
| Scarb3<br>(CD36) | Mm             | GGACATTGAGATTCTTTTCCTCTG | CAAAGGCATTGGCTGGAAGAAC   |
| Msr2             | Mm             | CCTGATCCAGAGTGCAATCGTG   | CACATCTCCGATGAAGGGCAAG   |
| Actin            | Mm             | AGAGGGAAATCGTGCGTGAC     | CAATAGTGATGATGACCTGGCCGT |
| Ifna             | Mm             | CTTCCACAGGATCACTGTGTACCT | TTCTGCTCTGACCACCTCCC     |
| Tnfa             | Mm             | CTCCAGGCGGTGCCTATGT      | GAAGAGCGTGGTGGCCC        |
| Il6              | Mm             | CCAGAAACCGCTATGAAGTTCC   | TCACCAGCATCAGTCCCAAG     |
| Cxcl10           | Mm             | ATCATCCCTGCGAGCCTATCCT   | GACCTTTTTTGGCTAAACGCTTTC |
